# 1 Metagenomic methylation patterns resolve complex microbial genomes

2

3 Elizabeth G. Wilbanks <sup>1\*</sup>, Hugo Doré <sup>1</sup>, Meredith H. Ashby <sup>2</sup>, Cheryl Heiner <sup>2</sup>, Richard J.  
4 Roberts <sup>3</sup>, Jonathan A. Eisen <sup>4</sup>

5

6 <sup>1</sup> Department of Ecology, Evolution and Marine Biology; University of California, Santa Barbara

7 <sup>2</sup> Pacific Biosciences; Menlo Park, CA

8 <sup>3</sup> New England Biolabs; Ipswich, MA

9 <sup>4</sup> Department of Ecology and Evolution, University of California, Davis

10

11 \* corresponding author

12 Email: [ewilbanks@ucsb.edu](mailto:ewilbanks@ucsb.edu)

13 Postal address:

14 Department of Ecology, Evolution and Marine Biology,

15 University of California, Santa Barbara

16 Santa Barbara, CA 93106-9620

17

18 Competing Interests:

19 Dr. R.J. Roberts works for New England Biolabs, a commercial supplier of restriction enzymes,

20 DNA methyltransferases, and other molecular biology reagents. Drs. Ashby and Heiner work for

21 Pacific Biosciences. Drs. Wilbanks, Doré, and Eisen declare no potential competing interests.

22

23

## 24 **Abstract**

25 The plasticity of bacterial and archaeal genomes makes examining their ecological and  
26 evolutionary dynamics both exciting and challenging. The same mechanisms that enable rapid  
27 genomic change and adaptation confound current approaches for recovering complete genomes  
28 from metagenomes. Here, we use strain-specific patterns of DNA methylation to resolve  
29 complex bacterial genomes from the long-read metagenome of a marine microbial consortia, the  
30 “pink berries” of the Sippewissett Marsh. Unique combinations of restriction-modification (RM)  
31 systems encoded by the bacteria produced distinctive methylation profiles that accurately binned  
32 and classified metagenomic sequences. We linked the methylation patterns of each  
33 metagenome-assembled genome with encoded DNA methyltransferases and discovered new  
34 restriction modification (RM) defense systems, including novel associations of RM systems with  
35 RNase toxins. Using this approach, we finished the largest and most complex circularized  
36 bacterial genome ever recovered from a metagenome (7.9 Mb with >600 IS elements), the  
37 finished genome of *Thiohalocapsa* sp. PB-PSB1 the dominant bacteria in the consortia. From  
38 these methylation-binned genomes, we identified instances of lateral gene transfer between  
39 sulfur-cycling symbionts (*Thiohalocapsa* sp. PB-PSB1 and *Desulfofustis* sp. PB-SRB1), phage  
40 infection, and strain-level structural variation.

41

## 42 **Introduction**

43 In nature, bacterial and archaeal genomes are far from the tidy, static sequence of letters  
44 in our databases. They are, quite simply, alive – with all of the dynamism and complexity that  
45 we associate with life. Genomes can change substantially within the lifetime of a single cell,  
46 catalyzed by the intra- and inter-genomic shuffling of homologous recombination, mobile

47 genetic elements, and phage. Unlike the gradual accumulation of point mutations, such bulk  
48 rearrangements can abruptly diversify an organism's phenotypic traits and alter its niche (Bao et  
49 al 2016, Berube et al 2019, Doré et al 2020, Hehemann et al 2016, Rocap et al 2003). Horizontal  
50 gene transfer (HGT), such as the acquisition of pathogenicity islands or antibiotic resistance  
51 genes from a distantly related species, is perhaps the most notorious example of recombination  
52 abruptly changing an organism's capabilities. However, even small-scale recombination within  
53 an organism's own genome can alter important phenotypes, such as biofilm formation regulated  
54 by excision/insertion of an IS-element (Bartlett et al 1988, Higgins et al 2007, Ziebuhr et al  
55 1999). The very same molecular features that enable rapid evolutionary change (genomic  
56 repeats, unusual sequence content and composition) also present analytical challenges, creating a  
57 disturbing blind spot in our study of microbial eco-evolutionary dynamics.

58         Metagenomic assembly algorithms founder when confronted with repetitive sequences;  
59 DNA sequences generated by most commonly used high-throughput methods are too short to  
60 unambiguously resolve the correct path through these complex regions of the assembly graph  
61 (Olson et al 2019). From samples with co-existing strains of the same species or for organisms  
62 primed for rearrangements because of their richness in repeats like transposons, we typically  
63 recover only genomic shrapnel, their recombination hotspots expunged. The highest quality  
64 metagenome assembled genomes (MAGs) often come from the most clonal species in a  
65 community (e.g. Banfield et al. 2017), not necessarily the most abundant or ecologically  
66 important (Chen et al. 2020). Assembly shortcomings beget further challenges, as smaller  
67 assembled sequences (contigs or scaffolds) are more difficult to correctly assign to their genomes  
68 of origin (i.e. binning).

69           Binning algorithms suffer from similar challenges because they classify assembled  
70 metagenomic sequences based on a set of shared, distinctive genome-wide signals (Chen et al  
71 2020). Commonly used signals include phylogenetic profiles (sequence similarity to known  
72 organisms, e.g. Huson et al 2007), sequence composition (GC content or tetranucleotide  
73 frequency, e.g. Dick et al 2009, Tyson et al 2004), and relative abundance (coverage variation  
74 within a sample or across samples, e.g. Albertsen et al 2013). Accurate bins draw support from  
75 multiple, concordant signals that persist across all the sequences constituting the draft genome  
76 (Meyer et al 2018, Sieber et al 2018). However, in the mosaic genomes of many bacteria and  
77 archaea, such genome-wide consistency does not exist. Infecting (pro)phage, mobile elements,  
78 and laterally transferred genes all have evolutionary histories distinct from their host genome.  
79 The discord in phylogenetic and compositional profiles between these regions and the rest of the  
80 genome confounds binning algorithms relying on such signals (Maguire et al 2020). It remains  
81 challenging to faithfully reunite those sequence fragments that once comingled within the cell.  
82 Recent advances in binning leverage information about the genome orthogonal to its sequence,  
83 such as chromosomal conformation (Beitel et al 2014, Stewart et al 2018) or DNA methylation  
84 (Beaulaurier et al 2018).

85           In the present work, we studied the DNA methylation signals that bacteria and archaea  
86 use to discriminate their *own* genome from foreign DNA to overcome issues with assembling  
87 and binning complex microbial genomes from metagenomes. The most common base  
88 modifications in bacterial and archaeal genomes are made by the DNA methyltransferases  
89 (MTases), frequently associated with restriction-modification (RM) systems (Blow et al 2016).  
90 The restriction endonucleases of an RM system defend their host from foreign DNA by cleaving  
91 unmethylated DNA at sequence-specific recognition sites (Figure 1). The cognate MTase

92 methylates recognition sites in the host's genome, thereby protecting them from restriction  
93 enzyme activity (Figure 1C, Murray 2000). Beyond their role in host defense, MTases have been  
94 shown to play important physiological roles, from regulating gene expression to DNA replication  
95 and repair (Sanchez-Romero and Casadesus 2020).

96 Specific MTase recognition sites can be discovered from genome-wide surveys of DNA  
97 modification by examining the short stretches of sequence surrounding the methylated base, and  
98 summarizing recurrent patterns as methylated motifs (Figure 1D, Beaulaurier et al 2019). RM  
99 systems are diverse and widespread amongst bacteria and archaea, and like many defense  
100 systems, they vary greatly even between closely related species (Koonin et al 2017). We  
101 identified species-specific methylation patterns on metagenomic contigs from the DNA  
102 polymerase kinetics of Pacific Biosciences (PacBio) sequence data. We used this methylation  
103 information to bin and assemble complex bacterial genomes from a microbial consortium, the  
104 "pink berries" of the Sippewissett marsh, macroscopic microbial aggregates, for which we  
105 previously recovered complete but highly fragmented MAGs (Wilbanks et al 2014).

106

## 107 **Results**

108

### 109 *Methylation in metagenomes: detection and clustering of sequence data*

110 PacBio data from "pink berry" aggregates were assembled to produce 18 megabases  
111 (Mb) of sequence on 169 contigs, with an N50 of 413 kb, where the largest contig was 3.5 Mb in  
112 size. This assembly recruited back 87% of the error corrected reads, indicating that it was a  
113 reasonable representation of the data. N<sup>6</sup>-methyladenine (6mA) was detected on every contig  
114 (modification QV  $\geq$  20, *i.e.* p-value  $\leq$  0.01), while N<sup>4</sup>-methylcytosine (4mC) was detected on

115 152 out of the 169 contigs (Supplemental Figure 1 and Supplemental Data 1). The average  
116 frequency of m6A detections per 10 kb of contig sequence was independent of coverage above  
117 40x coverage, indicating good detection sensitivity for most assembled contigs (Supplemental  
118 Figure 2A). In contrast, m4C modifications were both rarer and strongly correlated with  
119 coverage up to ~60x coverage, which suggests decreased detection sensitivity on many contigs  
120 (Supplemental Figure 2B).

121 Thirty-two sequence motifs were identified from the sequence context of these  
122 methylations by analyzing a subset of large contigs in the dataset using the SMRT Analysis  
123 workflow (Supplemental Table 1). For each of these motifs, we quantified how many times the  
124 sequence occurred on a contig and whether that sequence was methylated. Thus, each contig has  
125 a “methylation profile” composed of 32 distinct methylation metrics, quantifying proportion of a  
126 motif’s occurrences that were methylated.

127

### 128 *Methylation-based clustering recovers metagenome-assembled genomes*

129 The methylation profiles differed significantly between metagenomic contigs, and  
130 hierarchical clustering partitioned this data into seven distinct groups (Figure 2). These groups  
131 were largely recapitulated by independent clustering using t-distributed stochastic neighbor  
132 embedding (t-SNE) of the methylation profiles, and these groups represented taxonomically  
133 coherent bins of the dominant organisms in the consortia (Figure 3A, Table 1). These  
134 methylation clusters were also largely consistent with similarities in sequence composition, such  
135 as tetranucleotide frequency and GC-content (Figure 3B and Supplemental Figure 3,  
136 respectively).

137

138 *Binning and circular assembly of the Thiohalocapsa sp. PB-PSB1 genome (Cluster 7)*

139 Cluster 7, the largest of the methylation groups at 8.3 Mb, represented a 99% complete  
140 MAG for *Thiohalocapsa sp. PB-PSB1*, the most abundant organism in the consortia (Table 1)  
141 (Wilbanks et al., 2014, Seitz et al. 1993). This bin assembled to long contigs (N50 450 kb, max  
142 3.5 Mb), unlike corresponding Illumina MAGs, which were far more fragmented (N50 ~40 kb,  
143 max 160 kb). Contigs in this cluster larger than 100 kb (n=15) had an average coverage of 489x,  
144 while the smaller contigs (<25 kb, n=22) were lower coverage with an average of 57x.

145 Of the 37 contigs in this bin, 31 were clearly identified by sequence similarity as  
146 *Thiohalocapsa sp. PB-PSB1* (Figure 3A). Six contigs did not have clear taxonomic assignments,  
147 but grouped most closely with other PB-PSB1 contigs based on sequence composition (Figure  
148 3B). Five of these taxonomically unidentified contigs also shared strong assembly graph  
149 connectivity with other PB-PSB1 contigs. Contamination for this cluster, estimated based on the  
150 percentage of single copy marker gene sets present in multicopy, was predicted to be 6.6%.  
151 However, 61% of these multicopy marker genes (20 in total) shared  $\geq 97\%$  amino acid identity  
152 between copies, and no multicopy genes revealed hits to distantly related taxa. These multicopy  
153 genes, therefore, may not indicate contamination, but rather strain-level variation, incomplete  
154 assembly, or recent duplications.

155 Within methylation cluster 7, a subclade of seven, smaller contigs (7a, length < 25 kb,  
156 coverage  $46 \pm 7x$ ) shared an unusual methylation profile relative to other contigs. While the  
157 contigs in clade 7a encode the sequence of the characteristic PB-PSB1 motifs m8, m13, m14,  
158 m18, and m19, these motifs were rarely methylated. By contrast, these motifs were almost  
159 universally methylated when they occurred on the other contigs in methylation group 7, even on  
160 contigs with less than 40x coverage.

161 Reassembly of cluster 7 sequence data produced a circular assembly graph formed by 9  
162 backbone contigs. In addition, there were 51 small contigs forming “bubbles” or spurs  
163 connected to this main assembly graph (length <25 kb, 543 kb total), and four “singleton”  
164 contigs unconnected to the circular assembly graph (length < 22 kb, 57 kb total). With manual  
165 curation, the genome was closed to produce a single circular contig of 7.95 Mb which represents  
166 the finished genome of *Thiohalocapsa* sp. PB-PSB1 (CP050890). This finished genome  
167 contains 606 insertion sequence (IS) elements which comprise 9.4% of the total genome  
168 sequence (Table 2). These IS elements were both diverse, belonging to 17 phylogenetically  
169 distinct families, and highly repetitive as demonstrated by a 1.5 kb IS154 transposon found in 44  
170 identical copies distributed throughout the genome.

171

#### 172 *Identifying HGT in Desulfofustis sp. PB-SRB1 (Clusters 1 & 6)*

173 Methylation clusters 1 and 6 comprised the complete (99%) and uncontaminated (<0.5%)  
174 genome of *Desulfofustis* sp. PB-SRB1. Sequence similarity and composition both confirmed that  
175 these two methylation clusters contain contigs originating from a single organism that is highly  
176 similar to prior data from *Desulfofustis* sp. PB-SRB1 (Figure 3B) (Wilbanks et al 2014). Cluster  
177 1 shared some common methylated motifs with PB-PSB1 (e.g. m3 and m10), but also contains  
178 other frequently methylated motifs (m20-m27) that were unique to PB-SRB1 (Figure 2). Though  
179 the methylation profiles of contigs in clusters 1 and 6 differ from one another (Figure 3A), they  
180 shared several key similarities, namely, the methylation of motifs m20, m3 and m21 and absence  
181 of methylation on other motifs (Figure 2). These two clusters differed significantly in coverage:  
182 cluster 1 contained the majority of the genome at ~ 50x coverage, while cluster 6 contained only  
183 63 kb at ~11x coverage (Table 1). Many cluster 6 contigs shared sequence similarity with larger



184 higher coverage portions of the assembly grouped in cluster 1, and may represent structural  
185 variants (some had transposon deletions or sequence rearrangements relative to their parent  
186 contigs).

187 One 10 kb contig, unitig\_146, grouped with cluster 1 in both hierarchical and t-sne  
188 clustering based on methylation profiling, but was most similar to *Thiohalocapsa* sp. PB-PSB1  
189 contigs in sequence composition (Figure 3). Given the conflicting evidence, we further  
190 investigated this contig to determine whether this represented HGT or a binning error. We  
191 manually inspected this contig in the reassembled PB-SRB1 genome and found no evidence of  
192 misassemblies. This contig encodes two class C beta-lactamase genes alongside a D-glutamate  
193 deacylase and prolidase, functions which suggest that this gene cassette enables both the opening  
194 of beta-lactam rings and decarboxylation to their constituent D-amino acids (Figure 4).  
195 Flanking these genes were two transposons (IS481 and IS701) most closely related to homologs  
196 from the *Desulfobacterales* and found in multiple copies on the other contigs in the PB-SRB1  
197 genome. Neither of these transposons were found in the closed genome of *Thiohalocapsa* sp.  
198 PB-PSB1. This contig was in a complex region of the PB-SRB1 assembly graph, with  
199 connectivity to two large contigs containing PB-SRB1 marker genes (>100 kb), and two smaller  
200 contigs (<10 kb). Alignment of these contigs and their component reads revealed numerous  
201 structural variants in this region (duplications and inversions). Combined with the distinctive  
202 methylated motifs present on this contig, these findings give us confidence in our assignment of  
203 this contig as a true portion of the PB-SRB1 genome.

204 Alignment of this *Desulfofustis* sp. PB-SRB1 contig with the closed *Thiohalocapsa* sp.  
205 PB-PSB1 genome revealed sequence similarity only in the 3.7 kb region containing these two  
206 beta-lactamase genes (Figure 4). This region of the PSB1 genome overlaps with a 29 kb

207 prophage complete with flanking attL and attR insertion sites. However, this prophage region  
208 was not conserved in PB-SRB1.

209

### 210 *Resolving three distinct Alphaproteobacteria*

211 The remaining methylation clusters 2 – 5 are composed of contigs from 3 different  
212 *Alphaproteobacteria*. Motif m29 (GANTC) was frequently methylated on nearly all contigs  
213 from clusters 2 – 5. Cluster 3, which was characterized by frequent methylation of motif m28  
214 (RGATCY) in addition to m29, represents a partial and uncontaminated MAG closely related to  
215 *Oceanicaulis alexandrii* (Figure 2-3, Table 1).

216

### 217 *A novel genus in the Rhodobacteraceae (Clusters 4&5)*

218 Binning together methylation clusters 4 and 5, we recovered a 4.7 Mb, 95% complete  
219 MAG with 4% contamination corresponding to strain heterogeneity (Table 1). This long-read  
220 bin shared 99.8% ANI with a 4.2 Mb MAG from our Illumina dataset (PB-A2), estimated to be  
221 97.5% complete with 0.4% contamination. By tree placement and ANI (99%), these MAGs'  
222 closest relative in public databases is UBA10424 (GCA\_003500165.1, N50 = 13 kb), an 88%  
223 complete MAG extracted from our previous, lower coverage sequencing of this same system in  
224 2010, and proposed to be the sole representative of a novel genus in the *Rhodobacteraceae*.

225 While these clusters were separated in methylation space, they grouped closely together  
226 based on sequence composition (Figure 3). Cluster 5 contained the majority of the genome (4.5  
227 Mb), while cluster 4 contained smaller, lower coverage fragments (Table 1). Many of the high  
228 GC contigs in these methylation clusters could be identified by sequence similarity as belonging  
229 to the family *Rhodobacteraceae*. Contigs without clear taxonomic identity could be linked with

230 the other *Rhodobacteraceae* contigs based on their overlap-based assembly graph connectivity.  
231 These groups shared methylation of m28 and m29 with cluster 3 (*Oceanicaulis*) but were  
232 distinguished by the methylation of m30 (CANCAATC) and m32 (GATGGA).

233 Cluster 4 contained three low GC contigs from the *Bacteroidetes* that represent  
234 contamination (black arrow Figure 3). Though these contigs did contain detected modifications  
235 (Supplemental Data 1), these methylations either never (unitig\_245) or rarely (unitig\_260,  
236 unitig\_174) occurred within one of the 32 characteristic motifs. This data suggests that these  
237 contigs grouped with the lowest coverage contigs (cluster 4) in our dataset based on the absence  
238 of methylated motifs, rather than any positive signal.

239

240 *Linking phage infection with a novel Micavibrionaceae species (Cluster 2)*

241 Cluster 2 comprises 158 kb of sequence on six contigs, four of which were identified as  
242 belonging to the *Micavibrionaceae* by sequence similarity (Table 1). The methylation profile of  
243 cluster 2 contained m29, like the other *Alphaproteobacteria*, but was missing m28. Cluster 2  
244 was further distinguished by distinctive combination of methylated motifs m25, a 4mC motif  
245 (CCAGCG), and m11 (GAGATG). The contigs identified as *Micavibrionaceae* (30x coverage)  
246 mapped with high identity to a MAG (PB-A3) binned from our parallel Illumina assembly (84%  
247 complete, 0.5% contamination, N50 32 kb). This MAG's closest relative in public databases is  
248 UBA10425 (GCA\_003499545.1), an 80% complete genome extracted from our prior, lower  
249 coverage sequencing of this same system, and proposed to be the sole representative of a novel  
250 genus within the *Micavibrionaceae*.

251 The remaining two contigs in cluster 2 were present at significantly higher coverage (70x  
252 and 110x) and were identified as putative phage sequences. Notably, while these contigs

253 clustered closely with the others based on their methylation profiles (Figure 3A), they had  
254 markedly different sequence composition relative to the other *Micavibrionaceae* contigs (Figure  
255 3B). The first of these, unitig\_102, was an outlier at 110x coverage, which was the highest  
256 coverage contig in this dataset that was not from *Thiohalocapsa* sp. PB-PSB1. This 75 kb contig  
257 is predicted to encode a complete *Siphoviridae* dsDNA phage genome, with both structural and  
258 DNA replication genes. Ten of these coding sequences shared high percent identity (32-66% aa  
259 identity) with a cultured temperate phage, phiJI001, known to infect an alphaproteobacterial  
260 isolate from the genus *Labrenzia*. Searches of this *Siphoviridae* contig against our Illumina  
261 based MAGs found high percentage identity matches to several contigs binned to  
262 *Micavibrionaceae* PB-A3. These contigs were linked to the PB-A3 bin based on paired-end read  
263 connectivity, but not by our sequence composition or coverage-based analyses. Unitig\_102  
264 could be circularized (with manual trimming), a common characteristic of *Siphoviridae*  
265 genomes; however, the PacBio data and Illumina paired end reads both supported scaffolding  
266 with a 100kb contig in the Illumina assembly which contained *Micavibrionaceae* marker genes.

267  
268 *Novel restriction-modification (RM) systems and orphan methyltransferases explain the diversity*  
269 *of methylation patterns in the metagenome*

270 To further investigate the patterns of DNA methylation in the consortia, we analyzed  
271 each MAG individually which detects methylated motifs with greater sensitivity. For the  
272 incomplete genomes (e.g. the alphaproteobacteria), we also analyzed their corresponding  
273 Illumina-assembled MAGs as validation. The genomes each contained from 4 to 17 different  
274 methylated motifs, and every genome had at least one methylated motif unique to that organism  
275 in the consortia (Figure 5A). This analysis recovered 30 of the 32 motifs from our initial

276 prediction, and also discovered 13 additional methylated motifs (Supplemental Data 2). There is  
277 substantial novelty in these genome modifications: 40% of these methylated motifs (n=17; red  
278 and navy bars in 4C) have never been reported in genome-wide methylation studies or databases  
279 of RM recognition sites (Roberts et al 2015).

280 We investigated the source of these methylation patterns by annotating the MTase and  
281 restriction enzyme genes in each genome. We found between 9 and 24 different MTase genes in  
282 each genome, and for ~50% of these genes, we could bioinformatically predict their recognition  
283 sequences, many of which matched methylated motifs in the genomes (Figure 5B, Supplemental  
284 Data 2). Every genome, except for *Oceanicaulis*, encoded 2-3 novel RM systems which we  
285 predict recognize and methylate (or cut) novel sequence motifs (navy blue bars, Figure 5C).

286 Several MTases in the *Oceanicaulis* and *Rhodobacteraceae* MAGs were found to be  
287 encoded on putative phage or prophage contigs (3 and 8 MTases, respectively). Most of these  
288 phage MTases occurred as “orphans”, without a corresponding restriction enzyme, though one  
289 60kb phage contig in the *Rhodobacteraceae* MAG encoded 3 Type II orphan MTases, as well as  
290 a complete Type I RM system (Supplemental Data 2). These sequences were quite divergent  
291 from known MTases, and as such their recognition sites could rarely be predicted, with the  
292 exception of GATC phage MTases which would likely confer protection against the hosts’  
293 RGATCY cleaving restriction enzymes.

294 Examining the RM systems in the *Thiohalocapsa* PB-PSB1 genome, we discovered that  
295 RM genes frequently co-occurred with putative RNase or RNA interferase toxin genes from the  
296 *vapC* or *hicA* family. Six of the 23 MTases in this genome were immediately flanked by these  
297 *vapC* or *hicA* toxins. Five of these cases encoded complete RM systems – including 3 out of the  
298 4 complete Type I operons in the genome (Supplemental Data 2). These loci encoded only the

299 toxin gene without an antitoxin; however, *vapB* and *hicB* family antitoxins were found elsewhere  
300 in the genome.

301

## 302 **Discussion**

303         Examining metagenomic methylation patterns, we binned and assembled complex  
304 bacterial genomes from a microbial consortium with substantial strain variation. Such  
305 methylation-based binning has been tested using cultured mock communities and the mouse gut  
306 microbiome (Beaulaurier et al 2018); however, this approach has yet to be validated in other  
307 systems. Though we use a different workflow in identifying methylated motifs, we similarly  
308 found that methylation patterns faithfully distinguish contigs from distinct species. We  
309 identified the host for a complete phage genome based on their similar patterns of DNA  
310 methylation, the first application of this novel approach for linking phage with their hosts.

311         With our approach, we finished the largest and most complex circular bacterial genome  
312 yet recovered from a metagenome. Though closing genomes is now routine with bacterial and  
313 archaeal isolates, circularized metagenome assembled genomes (cMAGs) remain rare and tend to  
314 be both clonal and small (Chen et al 2020), though they are becoming increasingly accessible  
315 with long read sequencing (Moss et al 2020). At 7.9 Mb, the circularized genome of  
316 *Thiohalocapsa* PB-PSB1 is the largest finished genome ever reconstructed from a metagenomic  
317 sample, exceeding long-read pseudomonad cMAG by nearly 1.5 Mb (White et al 2016).

318         Previous short read metagenomes recovered complete but highly fragmented genomes for  
319 the most abundant species in the consortium, *Thiohalocapsa* sp. PB-PSB1 and *Desulfofustis* sp.  
320 PB-SRB1 (Wilbanks et al 2014), which suggested strain complexity or intragenomic repeats.  
321 Indeed, the finished *Thiohalocapsa* PB-PSB1 genome is highly repetitive: it harbors amongst the

322 highest number of transposons ever reported in a bacterial or archaeal genome (Newton and  
323 Bordenstein 2011, Touchon and Rocha 2007). With 9.4% of its genome comprising transposon  
324 sequence, *Thiohalocapsa* PB-PSB1 has an unusual genome structure for free-living bacteria,  
325 though not unprecedented among aggregate- and bloom-forming phototrophs (Hewson et al  
326 2009, Kaneko et al 2007). Repetitive mobile elements are not only vehicles for transposition and  
327 HGT, but also frequently flank hotspots of homologous recombination in bacterial genomes  
328 (Everitt et al 2014, Oliveira et al 2017). The transposon abundance in *Thiohalocapsa* PB-PSB1,  
329 thus, indicates substantial potential for recombination and genome plasticity.

330         Strain-level structural variants of transposons (e.g. deletions, inversions) were evident in  
331 both the PB-PSB1 assembly graph and in mapped reads spanning transposon regions in the  
332 finished genome. In the hierarchical clustering of contigs by methylation profile, we observed a  
333 clade of small contigs from PB-PSB1 where several distinctive sequence motifs remained  
334 unmethylated (Figure 2, cluster 7a). These sequences were structural variants of the finished,  
335 circular genome and contained transposons which we found, in different sequence contexts,  
336 elsewhere in the finished genome. Considered together, this evidence suggests that sequences in  
337 cluster 7a originate from a distinct strain, distinguished from the most abundant PB-PSB1 strain  
338 by genome rearrangements near transposons, and missing or inactive MTases. While these  
339 missing methylations could be an artifact of low coverage, we find this interpretation unlikely as  
340 these motifs were frequently methylated on many lower coverage contigs in PB-PSB1 and  
341 coverage as low as 15x can reliably detect Type I motif methylations (Blow et al. 2016).

342         The *Desulfofustis* sp. PB-SRB1 genome was complete but remained draft quality (n=72,  
343 N50 385 kb, max 930 kb), due to strain-level structural variants and lower coverage.  
344 Methylation profiling provided key information allowing us to link an island of horizontally

345 transferred antibiotic resistance genes to the *Desulfofustis* sp. PB-SRB1 genome. This small  
346 contig would have almost certainly been erroneously binned with the *Thiohalocapsa* sp. PB-  
347 PSB1 genome by most algorithms; however, we were able to correctly identify it as belonging to  
348 *Desulfofustis* sp. PB-SRB1 based on its distinctive methylation profile.

349         The patterns of methylation in the pink berry MAGs are highly novel and offer a window  
350 into unexplored microbial DNA methylation systems: 40% of methylated motif we found have  
351 no matches in restriction enzyme databases (Roberts et al. 2015). Systematically annotating the  
352 MTase genes in each genome, we discovered 7 RM systems that we predict recognize some of  
353 these novel methylated motifs. The majority of these novel MTases were Type I systems  
354 recognizing asymmetric target sites with the nonspecific spacer of 4 – 8 bp (typically 6 bp),  
355 characteristic of Type I RM systems (Murray 2000). *Thiohalocapsa* sp. PB-PSB1 remains a rich  
356 target the discovery of yet more novel MTases, with a dozen uncharacterized MTases (pink bars  
357 in Figure 5B) and five novel methylated motifs without a predicted MTase (red bars in Figure  
358 5C). Clearly, further experimental characterization of these MTases and restriction enzymes is  
359 warranted and could yield enzymes of biotechnological utility (Buryanov and Shevchuk 2005).

360         In the PB-PSB1 genome, we discovered RNA-targeting *vapC* and *hicA* toxin genes  
361 immediately adjacent to RM systems, a co-occurrence that has not previously been reported. We  
362 propose that these VapC and HicA homologs play a role in programmed cell death, analogous to  
363 the PrrC-Ecoppr1 abortive infection system in *E. coli* (Tyndall et al 1994). Though these  
364 systems do not show homology based on sequence comparisons, the functional parallels are  
365 notable. The PrrC abortive infection system includes an anticodon tRNA nuclease which initiates  
366 programmed cell death, should the Type I restriction enzyme defense fail against phage infection  
367 (Figure 6) (reviewed by Kaufmann 2000). Our preliminary investigations found *vapC* or *hicA*



368 homologs also co-occurred with RM genes in other bacterial genomes. Such RNA-acting  
369 apoptotic toxins may be more widely integrated with restriction enzymes as a “fail-safe” defense  
370 than was previously appreciated.

371 Resolving these complex features in bacterial genomes opens exciting frontiers for  
372 investigations of microbial consortia and gives us a lens that allows us to examine how  
373 ecological interactions – from symbioses to predation— shape bacterial evolution.

374

## 375 **Methods**

### 376 *Sampling and library preparation*

377 Pink berry aggregates were sampled in July 2011 from Little Sippewissett Salt Marsh, as  
378 described previously, and DNA was extracted using a modified phenol chloroform protocol (see  
379 Supplemental Methods). We created three distinct samples from which DNA was extracted: a  
380 very large aggregate ~9 mm in diameter (berry9), a pool of 13 aggregates 2-3 mm in diameter  
381 (s01), and a pool of 10 aggregates of similar size (s02). Transposase-based Illumina Nextera XT  
382 libraries were constructed for samples berry9 and s02. Sample berry9 was sequenced via  
383 Illumina MiSeq (1Gb of 250 bp paired end reads), while sample s02 was sequenced with both  
384 Illumina HiSeq (150PE) and a MiSeq run (250PE).

385 SMRTbell libraries for Pacific Biosciences sequence were constructed from 900 ng of  
386 berry9 DNA and ~1 microgram of s01 DNA. Sample s01 was size selected by Blue Pippin,  
387 while berry9 was selected with Ampure beads. In total, 42 SMRT cells were sequenced using  
388 PacBio RSII from these two libraries using a combination of P4C2 and P5C3 chemistries (25  
389 cells from the berry9 Ampure library and 17 from the s01 BluePippin library). While Blue  
390 Pippin size-selection increased the proportion of reads greater than 8 kb, library sequence yield

391 was poor when compared to the more robust Ampure bead library (44 Mb of filtered subreads  
392 per cell vs. 8.1 Gb of filtered subreads per cell). The PacBio data were pooled for further  
393 processing and are overwhelmingly represented by the sequence data from the berry9 sample  
394 (92% of filtered subread basepairs).

395

### 396 Metagenomic assembly

397 Illumina sequence from sample s02 was trimmed and filtered with sga (preprocess -q 20 -  
398 f 20 -m 59 --pe-mode=1; Simpson and Durbin, 2012), adapter filtered with TagDust (Lassmann  
399 et al 2009), and assembled with idba\_ud (maxk=250; v 1.0.9) (Peng et al 2012). This Illumina  
400 assembly was binned and curated as described previously (Wilbanks et al 2014). Binned  
401 sequence was reassembled and the MAGs were quality assessed with CheckM (Parks et al 2015).

402 PacBio sequence data were error corrected using SMRT Analysis 2.2, yielding 474 Mb of  
403 error corrected reads. Error corrected reads longer than 7 kb were assembled with the HGAP  
404 assembler (v. 3.3) using a reduced genome size parameter (genomeSize = 5,000,000) to increase  
405 tolerance of uneven coverage and an increased overlap error rate parameter (ovlErrorRate =  
406 0.10) and overlap length (ovlMinLen =60) to encourage contig merging. The topology of the  
407 assembly graph (Celera Assembler's "best.edges") for the PacBio assembly was visualized in  
408 Gephi (Bastian et al 2009) to determine connectivity between fragmented contigs. This  
409 connectivity was used as an additional metric for binning validation, analogous to an approach  
410 proposed for short read assemblies (Mallawaarachchi et al 2020). Metagenomic contigs were  
411 quality checked and taxonomically identified as described in the Supplemental Methods.

412

413

414 *Methylation analysis and metagenomic binning*

415           Methylated bases and their associated motifs were detected on the assembled contigs  
416 using the SMRT Analysis v. 2.2 module RS\_Modification\_and\_Motif\_Analysis.1 with an *in*  
417 *silico* control model (modification quality value > 20). For detected motifs, we computed the  
418 percentage of methylated motifs out of the total instances of that motif on each contig. The  
419 vector of percent methylations for all characteristic motifs represents the contig's methylation  
420 profile. Contigs were hierarchically clustered in Cytoscape (v 3.5.1) using Clustermaker2  
421 (Morris et al 2011) based on the Euclidean distance between square root transformed  
422 methylation profiles. t-distributed stochastic nearest neighbor clustering (t-SNE) of contigs  
423 based on both methylation profiles and tetranucleotide frequencies was performed with the Rtsne  
424 package (van der Maaten 2014) and visualized with ggplot2 (Wickham 2016) in R. Binned  
425 sequences were individually reassembled with HGAP. The PB-PSB1 MAG was circularized and  
426 manually curated using Geneious (v R11). MAGs were polished with pilon (Walker et al. 2014)  
427 using both Illumina and PacBio data, and corrections were manually verified for short-read  
428 mapping errors.

429           The methylated motifs in each MAG were predicted independently using SMRT Analysis  
430 (v. 2.2). For incomplete genomes (e.g. alphaproteobacterial MAGs), both PacBio- and Illumina-  
431 assembled versions of the MAG were used as the reference genome used to recruit the PacBio  
432 reads for methylation analysis. Restriction modification system annotation and motif matching  
433 was accomplished by comparison of the genome sequences and methylated sequence motifs with  
434 the Restriction Enzyme Database (REBASE) (Roberts et al 2015), as previously described (Blow  
435 et al 2016).

436

437 Data availability

438 All sequence data has been deposited in DDBJ/ENA/GenBank under BioProject PRJNA684324.  
439 The accession numbers for the Short Read Archive and genome / metagenome data are provided  
440 in Supplemental Table 2.

441

442 **Competing Interests**

443 Dr. R.J. Roberts works for New England Biolabs, a commercial supplier of restriction enzymes,  
444 DNA methyltransferases, and other molecular biology reagents. Drs. MH. Ashby and C Heiner  
445 work for Pacific Biosciences. Drs. Wilbanks, Doré, and Eisen declare no potential competing  
446 interests.

447

448 **References**

449 Albertsen M, Hugenholtz P, Skarshewski A, Nielsen KL, Tyson GW, Nielsen PH (2013). Genome  
450 sequences of rare, uncultured bacteria obtained by differential coverage binning of multiple  
451 metagenomes. *Nature Biotechnology* **31**: 533.

452 Banfield JF, Anantharaman K, Williams KH, Thomas BC (2017). Complete 4.55 megabase pair genome  
453 of "Candidatus *Fluviicola riflensis*," curated from short-read metagenomic sequences. *Genome*  
454 *Announc.* **5**:e01299-17

455 Bao YJ, Shapiro BJ, Lee SW, Ploplis VA, Castellino FJ (2016). Phenotypic differentiation of  
456 *Streptococcus pyogenes* populations is induced by recombination-driven gene-specific sweeps.  
457 *Scientific Reports* **6**: 36644.

458 Bartlett DH, Wright ME, Silverman M (1988). Variable expression of extracellular polysaccharide in the  
459 marine bacterium *Pseudomonas atlantica* is controlled by genome rearrangement. *PNAS* **85**: 3923-  
460 3927.

- 461 Bastian M, Heymann S, Jacomy M: Gephi: an open source software for exploring and manipulating  
462 networks. *International AAAI Conference on Weblogs and Social Media*. 2009.
- 463 Beaulaurier J, Zhu SJ, Deikus G, Mogno I, Zhang XS, Davis-Richardson A *et al* (2018). Metagenomic  
464 binning and association of plasmids with bacterial host genomes using DNA methylation. *Nature*  
465 *Biotechnology* **36**: 61.
- 466 Beaulaurier J, Schadt EE, Fang G (2019). Deciphering bacterial epigenomes using modern sequencing  
467 technologies. *Nat Rev Genet* **20**: 157-172.
- 468 Beitel CW, Froenicke L, Lang JM, Korf IF, Michelmore RW, Eisen JA *et al* (2014). Strain- and plasmid-  
469 level deconvolution of a synthetic metagenome by sequencing proximity ligation products. *PeerJ* **2**.
- 470 Berube PM, Rasmussen A, Braakman R, Stepanauskas R, Chisholm SW (2019). Emergence of trait  
471 variability through the lens of nitrogen assimilation in *Prochlorococcus*. *eLife* **8**: e41043.
- 472 Blow MJ, Clark TA, Daum CG, Deutschbauer AM, Fomenkov A, Fries R *et al* (2016). The epigenomic  
473 landscape of prokaryotes. *Plos Genetics* **12**: e1005854.
- 474 Buryanov Y, Shevchuk T (2005). The use of prokaryotic DNA methyltransferases as experimental and  
475 analytical tools in modern biology. *Anal Biochem* **338**: 1-11.
- 476 Chen LX, Anantharaman K, Shaiber A, Eren AM, Banfield JF (2020). Accurate and complete genomes  
477 from metagenomes. *Genome Research* **30**: 315-333.
- 478 Dick GJ, Andersson AF, Baker BJ, Simmons SL, Thomas BC, Yelton aP *et al* (2009). Community-wide  
479 analysis of microbial genome sequence signatures. *Genome biology* **10**: R85-R85.
- 480 Doré H, Farrant GK, Guyet U, Haguait J, Humily F, Ratin M *et al* (2020). Evolutionary mechanisms of  
481 long-term genome diversification associated with niche partitioning in marine picocyanobacteria.  
482 *Frontiers in Microbiology* **11**: e567431.
- 483 Everitt RG, Didelot X, Batty EM, Miller RR, Knox K, Young BC *et al* (2014). Mobile elements drive  
484 recombination hotspots in the core genome of *Staphylococcus aureus*. *Nature Communications* **5**:  
485 3956.

- 486 Hehemann JH, Arevalo P, Datta MS, Yu XQ, Corzett CH, Henschel A *et al* (2016). Adaptive radiation by  
487 waves of gene transfer leads to fine-scale resource partitioning in marine microbes. *Nature*  
488 *Communications* **7**: 12860.
- 489 Hewson I, Poretsky RS, Dyhrman ST, Zielinski B, White AE, Tripp HJ *et al* (2009). Microbial  
490 community gene expression within colonies of the diazotroph, *Trichodesmium*, from the Southwest  
491 Pacific Ocean. *ISME J* **3**: 1286-1300.
- 492 Higgins BP, Carpenter CD, Karls AC (2007). Chromosomal context directs high-frequency precise  
493 excision of IS492 in *Pseudoalteromonas atlantica*. *PNAS* **104**: 1901-1906.
- 494 Huson DH, Auch AF, Qi J, Schuster SC (2007). MEGAN analysis of metagenomic data. *Genome*  
495 *Research* **17**: 377-386.
- 496 Kaneko T, Nakajima N, Okamoto S, Suzuki I, Tanabe Y, Tamaoki M *et al* (2007). Complete genomic  
497 structure of the bloom-forming toxic cyanobacterium *Microcystis aeruginosa* NIES-843. *DNA*  
498 *Research* **14**: 247-256.
- 499 Kaufmann G (2000). Anticodon nucleases. *Trends Biochem Sci* **25**: 70-74.
- 500 Koonin EV, Makarova KS, Wolf YI (2017). Evolutionary genomics of defense systems in *Archaea* and  
501 *Bacteria*. *Annual Review of Microbiology* **71**: 233-261.
- 502 Lassmann T, Hayashizaki Y, Daub CO (2009). TagDust-a program to eliminate artifacts from next  
503 generation sequencing data. *Bioinformatics* **25**: 2839-2840.
- 504 Maguire F, Jia BF, Gray KL, Lau WYV, Beiko RG, Brinkman FSL (2020). Metagenome-assembled  
505 genome binning methods with short reads disproportionately fail for plasmids and genomic islands.  
506 *Microb Genomics* **6**. 10.1099/mgen.0.000436.
- 507 Mallawaarachchi V, Wickramarachchi A, Lin Y (2020). GraphBin: refined binning of metagenomic  
508 contigs using assembly graphs. *Bioinformatics* **36**: 3307-3313.
- 509 Meyer F, Hofmann P, Belmann P, Garrido-Oter R, Fritz A, Sczyrba A *et al* (2018). AMBER: Assessment  
510 of Metagenome BinnERs. *Gigascience* **7**: giy069.

- 511 Morris JH, Apeltsin L, Newman AM, Baumbach J, Wittkop T, Su G *et al* (2011). clusterMaker: a multi-  
512 algorithm clustering plugin for Cytoscape. *BMC Bioinformatics* **12**: 436
- 513 Murray NE (2000). Type I restriction systems: Sophisticated molecular machines (a legacy of Bertani and  
514 Weigle). *Microbiology and Molecular Biology Reviews* **64**: 412-434.
- 515 Newton ILG, Bordenstein SR (2011). Correlations Between Bacterial Ecology and Mobile DNA. *Curr*  
516 *Microbiol* **62**: 198-208.
- 517 Oliveira PH, Touchon M, Cury J, Rocha EPC (2017). The chromosomal organization of horizontal gene  
518 transfer in bacteria. *Nature Communications* **8**: 841.
- 519 Olson ND, Treangen TJ, Hill CM, Cepeda-Espinoza V, Ghurye J, Koren S *et al* (2019). Metagenomic  
520 assembly through the lens of validation: recent advances in assessing and improving the quality of  
521 genomes assembled from metagenomes. *Brief Bioinform* **20**: 1140-1150.
- 522 Parks DH, Imelfort M, Skennerton CT, Hugenholtz P, Tyson GW (2015). CheckM: assessing the quality  
523 of microbial genomes recovered from isolates, single cells, and metagenomes. *Genome Research*  
524 **25**: 1043-1055.
- 525 Peng Y, Leung HCM, Yiu SM, Chin FYL (2012). IDBA-UD: a de novo assembler for single-cell and  
526 metagenomic sequencing data with highly uneven depth. *Bioinformatics* **28**: 1420-1428.
- 527 Roberts RJ, Vincze T, Posfai J, Macelis D (2015). REBASE-a database for DNA restriction and  
528 modification: enzymes, genes and genomes. *Nucleic acids research* **43**: D298-D299.
- 529 Rocap G, Larimer FW, Lamerdin J, Malfatti S, Chain P, Ahlgren NA *et al* (2003). Genome divergence in  
530 two *Prochlorococcus* ecotypes reflects oceanic niche differentiation. *Nature* **424**: 1042-1047.
- 531 Sanchez-Romero MA, Casadesus J (2020). The bacterial epigenome. *Nature Reviews Microbiology* **18**: 7-  
532 20.
- 533 Sieber CMK, Probst AJ, Sharrar A, Thomas BC, Hess M, Tringe SG *et al* (2018). Recovery of genomes  
534 from metagenomes via a dereplication, aggregation and scoring strategy. *Nature Microbiology* **3**:  
535 836.

- 536 Stewart RD, Auffret MD, Warr A, Wiser AH, Press MO, Langford KW *et al* (2018). Assembly of 913  
537 microbial genomes from metagenomic sequencing of the cow rumen. *Nature Communications* **9**:  
538 870.
- 539 Touchon M, Rocha EPC (2007). Causes of insertion sequences abundance in prokaryotic genomes.  
540 *Molecular Biology and Evolution* **24**: 969-981.
- 541 Tyndall C, Meister J, Bickle TA (1994). The *Escherichia coli* Prr region encodes a functional type-Ic  
542 DNA restriction system closely integrated with an anticodon nuclease gene. *Journal of Molecular*  
543 *Biology* **237**: 266-274.
- 544 Tyson GW, Chapman J, Hugenholtz P, Allen EE, Ram RJ, Richardson PM *et al* (2004). Community  
545 structure and metabolism through reconstruction of microbial genomes from the environment.  
546 *Nature* **428**: 37-43.
- 547 van der Maaten L (2014). Accelerating t-SNE using Tree-Based Algorithms. *J Mach Learn Res* **15**: 3221-  
548 3245.
- 549 White RA, Bottos EM, Chowdhury TR, Zucker JD, Brislawn CJ, Nicora CD *et al* (2016). Moleculo long-  
550 read sequencing facilitates assembly and genomic binning from complex soil metagenomes.  
551 *Msystems* **1**: e00045-00016.
- 552 Wickham H (2016). *ggplot2: Elegant Graphics for Data Analysis*. Springer-Verlag: New York.
- 553 Wilbanks EG, Jaekel U, Salman V, Humphrey PT, Eisen JA, Facciotti MT *et al* (2014). Microscale sulfur  
554 cycling in the phototrophic pink berry consortia of the Sippewissett Salt Marsh. *Environmental*  
555 *Microbiology* **16**: 3398–3415.
- 556 Ziebuhr W, Krimmer V, Rachid S, Lossner I, Gotz F, Hacker J (1999). A novel mechanism of phase  
557 variation of virulence in *Staphylococcus epidermidis*: evidence for control of the polysaccharide  
558 intercellular adhesin synthesis by alternating insertion and excision of the insertion sequence  
559 element IS256. *Molecular Microbiology* **32**: 345-356.



560 **Figure Legends**

561 **Figure 1.** Restriction-modification (RM) systems provide bacteria and archaea with a defense against  
562 foreign DNA by discriminating self from non-self DNA based on methylation patterns. **(A)** RM systems,  
563 such as the Type II RM illustrated here, consist of a methylase (pink) and restriction enzyme (blue) which  
564 both recognize short, specific sequences in the genome (“recognition binding sites”, thick black lines).  
565 **(B)** Unmethylated recognition sites, such as the example shown in an infecting phage genome, are  
566 cleaved by the restriction enzyme. **(C)** The methylase acts like an antitoxin, an antidote to the restriction  
567 enzyme’s toxicity. The methylase binds and methylates the recognition site (which is often palindromic)  
568 at a specific base. The methylase binds and modifies hemi-methylated recognition sites, where one but  
569 not both strands are unmethylated, a characteristic which helps the cell discriminate newly replicated host  
570 DNA (hemi-methylated) from completely unmethylated foreign DNA. Methylation of both 5’ and 3’  
571 strands in the recognition site inhibits the cognate restriction enzyme, protecting that site from cleavage.  
572 **(D)** Methylases (and their cognate restriction enzymes) often tolerate variation in some positions of their  
573 recognition sites, as shown for position 3, in this example. A methylase’s binding site sequence can be  
574 discovered by analyzing the sequence context around methylated bases in the genome, and summarized  
575 by a sequence motif where the methylated base is underlined (shown here as a sequence frequency logo,  
576 top, or a consensus sequence, bottom).

577 **Figure 2.** Patterns of DNA methylation group metagenomic contigs into distinct clusters via hierarchical  
578 clustering. The methylation status of 32 distinct sequence motifs (m1-m32, columns) is shown on every  
579 metagenomic contig (rows, unitig 1 – unitig 169). The value plotted is the percentage of motifs  
580 methylated on every contig (square root transformed); bright green color indicates a motif for which  
581 every instance on that contig was methylated (100%), and black shows motifs for which no instances  
582 were methylated on that contig (0%). When no instances of the sequence motif were observed on a  
583 contig, this is indicated as missing data (gray). Rows and columns have been hierarchically clustered  
584 based on Euclidean distance. Distinct methylation clusters have been numbered 1-7.

585 **Figure 3.** Visualization with t-distributed stochastic neighbor embedding (t-SNE) of (A) methylation profiles  
586 and (B) tetranucleotide frequencies create taxonomically distinct clusters. Point size is scaled to either contig  
587 coverage (A) or contig length (B), fill color corresponds to the taxonomic assignment, and outline color  
588 represents the methylation-based hierarchical clusters defined in Figure 2. Prediction ellipses in panel A were  
589 defined for hierarchical methylation clusters with the assumption that the population is a multivariate t-  
590 distribution. Black arrows indicate the three overlapping low coverage, low GC (<45%) contigs within  
591 methylation cluster 4 that represent contamination from the *Bacteroidetes*. Pink arrows indicate a contig which  
592 had discordant binning between methylation profiling and tetranucleotide frequency analyses.

593 **Figure 4.** Genome alignment shows evidence for the horizontal transfer of antibiotic resistance genes  
594 between the bacterial symbionts *Thiohalocapsa* sp. PB-PSB1 (top, finished genome) and *Desulfofustis* sp.  
595 PB-SRB1 (bottom, unitig\_26). Highlighted in red is the homologous region identified by whole genome  
596 alignment, where bar height represents the degree of conservation. Highlighted in yellow are the highly  
597 conserved genes: beta-lactamase 1 (88% nucleotide identity; 97% aa similarity) and a fosphomycin  
598 resistance thiol transferase (91% nt id; 97% aa similarity). Beta-lactamase 2 (in blue), which contained an  
599 N-terminal twin arginine leader peptide, was less closely related (74% nt id; 88% aa sim). On unitig\_26,  
600 this region was flanked by transposons (purple) found on several other contigs in the *Desulfofustis* PB-  
601 SRB1 assembly. In the *Thiohalocapsa* sp. PB-PSB1 genome, this region falls within a 29 kb prophage  
602 (grey arrow). The attR insertion site (black line) for the prophage is not conserved in the unitig\_26  
603 sequence, as evidenced by the dip in sequence similarity in this region.

604 **Figure 5. (A)** Analysis of each metagenome-assembled genome (MAG) demonstrates that while some  
605 methylated motifs were observed amongst several consortia members (*redundant*, light green), each  
606 MAG contained methylated motifs unique to that species in the dataset (*unique*, dark green). (B) Each  
607 organism contained numerous methylase genes, which were classified as “active” (navy blue bars) when  
608 methylase’s predicted recognition sequence was methylated, “inactive” (grey) where the predicted  
609 recognition sequence was not frequently methylated, or “unknown” (pink) if the recognition sequence

610 could not be predicted bioinformatically. **(C)** Most methylated motifs in each MAG could be linked with  
611 a predicted source methylase (light blue, navy), though each genome (except for *Oceanicaulis*) had some  
612 motifs for which the source methylase remains unknown (pink, red). All genomes except for  
613 *Oceanicaulis* sp. A1 contained novel motifs yet to be documented in REBASE (red, navy), while others  
614 were redundant with known RM recognition sequences (light blue, pink).

615 **Figure 6.** *E. coli*'s *EcoprrI* **(A)** provides an example of an RM system with two different avenues to halt  
616 the spread of a phage infection, either a classic DNase-based Type I RM defense **(B)** or an RNase-based  
617 abortive infection strategy **(C)**. Encoded by a four gene operon **(A)**, the complex consists of PrrC, an  
618 tRNA<sup>Lys</sup>-specific anticodon nuclease, associated with a typical Type I RM system (a methylase (PrrA /  
619 HsdM, "M"), a specificity determinant that interacts with the DNA binding site (PrrB / SsdS, "S"), and a  
620 restriction enzyme (PrrD / HsdR, "R"). **(B)** *EcoprrI* assembles as a single protein complex, like other  
621 Type I RM systems, but with the addition of a latent, inactive PrrC subunit. During normal growth or  
622 infection by a susceptible virus, such as phage lambda, *EcoprrI* operates as a typical Type I restriction  
623 enzyme, and halts viral replication by cleaving the DNA of the infecting phage. **(C)** T4-phage encodes a  
624 resistance mechanism: a short peptide (Stp) which can bind to *EcoprrI* and inhibit its endonuclease  
625 activity, likely due to a conformational change. However, this same Stp-induced conformational change  
626 activates the complex's PrrC anticodon nuclease which cleaves host tRNA<sup>Lys</sup>. This RNase activity  
627 depletes the host's tRNA<sup>Lys</sup> which inhibits protein synthesis and kills the host. This "abortive infection"  
628 strategy, where the host cell detects resistant phage and sacrifices itself, stops viral replication and  
629 minimizes the spread of phage to the host's vulnerable clonal kin. We propose that the co-occurrence of  
630 Type I RM and other RNase toxin genes in the *Thiohalocapsa* sp. PB-PSB1 genome could represent an  
631 analogous system, combining both RM and abortive infection phage defenses.

632 **Table 1.** Summary of the seven methylation-based hierarchical clusters of metagenomic contigs defined  
633 in Figure 2. Metagenome-assembled genomes (MAGs) with completeness >90% are represented by  
634 methylation cluster 7, clusters 1+6, and clusters 4+5. Completeness was assessed by presence of lineage-  
635 specific single copy marker genes, while contamination was assessed by their presence in >1 copy. The  
636 proportion of observed multicopy marker gene sets sharing  $\geq 97\%$  amino acid identity is represented in the  
637 “strain heterogeneity” metric. For example, 16 marker genes in the *Rhodobacteraceae* MAG (clusters  
638 4+5, bottom line in table) were found in duplicate copies. In 12 of these 16 genes though, their duplicate  
639 copies shared  $\geq 97\%$  aa identity, indicating these “contaminants” derived from highly similar strains or  
640 incomplete assemblies, rather than inclusion of distant organisms due to binning errors (e.g. 75% strain  
641 het. = 12/16).

642 **Table 2.** A total of 606 insertion-sequence (IS) elements were identified in the finished, circularized  
643 genome of *Thiohalocapsa* sp. PB-PSB1. IS elements were classified into phylogenetically distinct  
644 families (based on the ACLAME database), and the total instances of each class was enumerated. The  
645 total number of nucleotides within each IS element class was determined and its percentage of the  
646 complete genome computed.

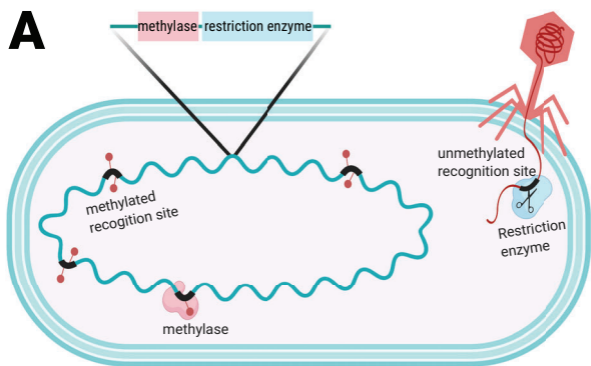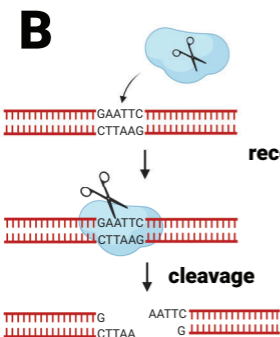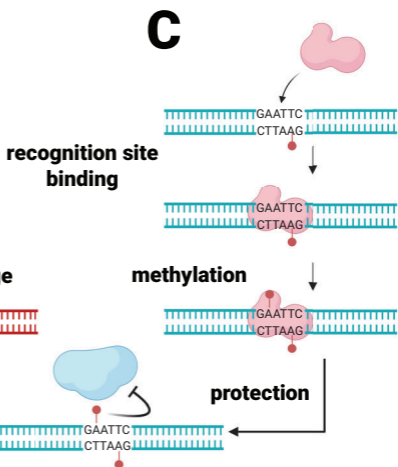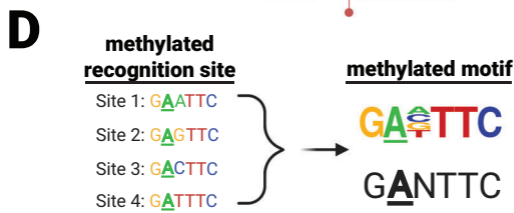

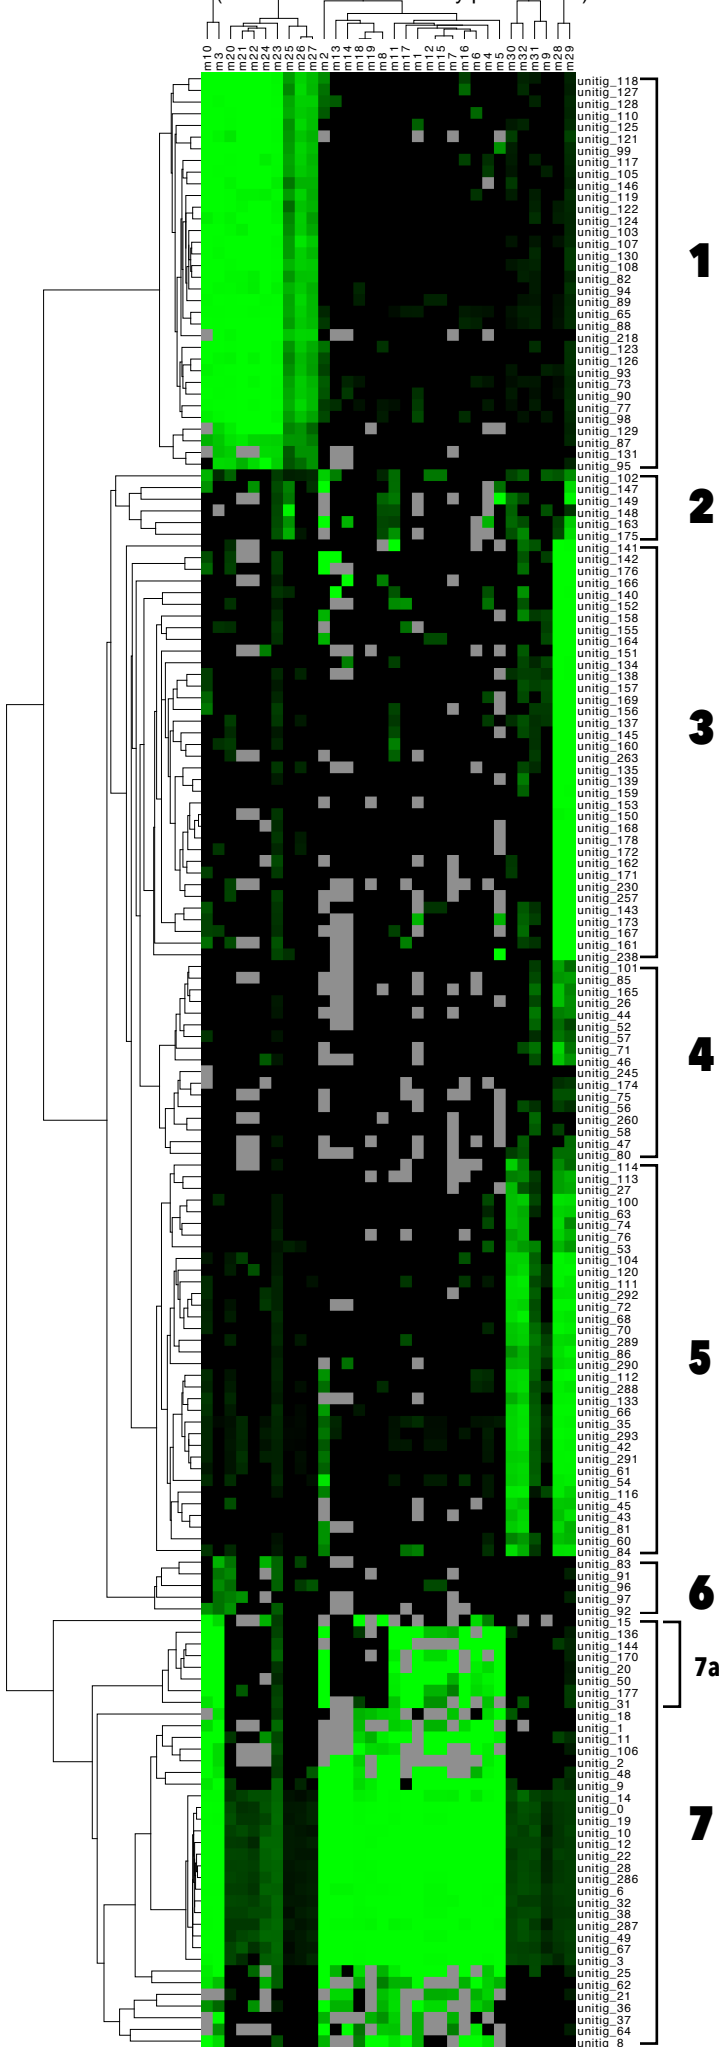

**A**

bioRxiv preprint doi: <https://doi.org/10.1101/2021.01.18.427177>; this version posted January 18, 2021. The copyright holder for this preprint (which was not certified by peer review) is the author/funder. All rights reserved. No reuse allowed without permission.

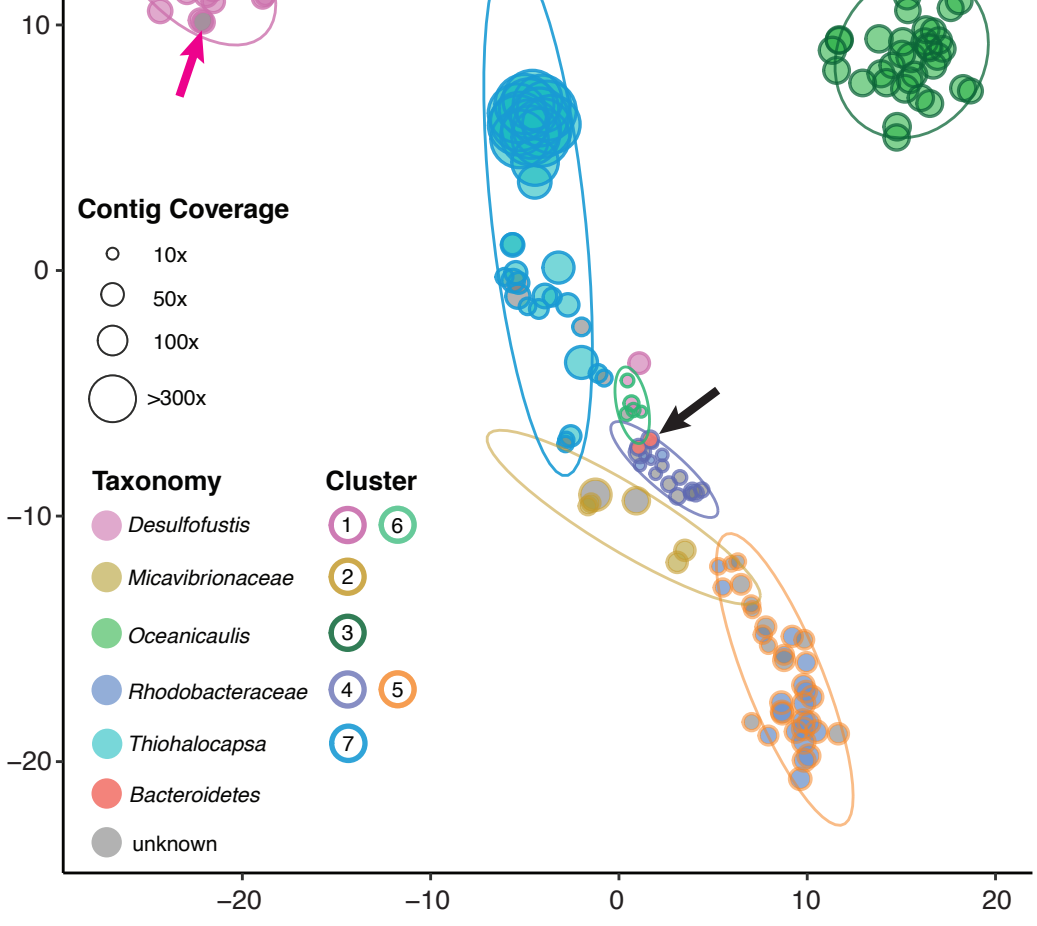**B**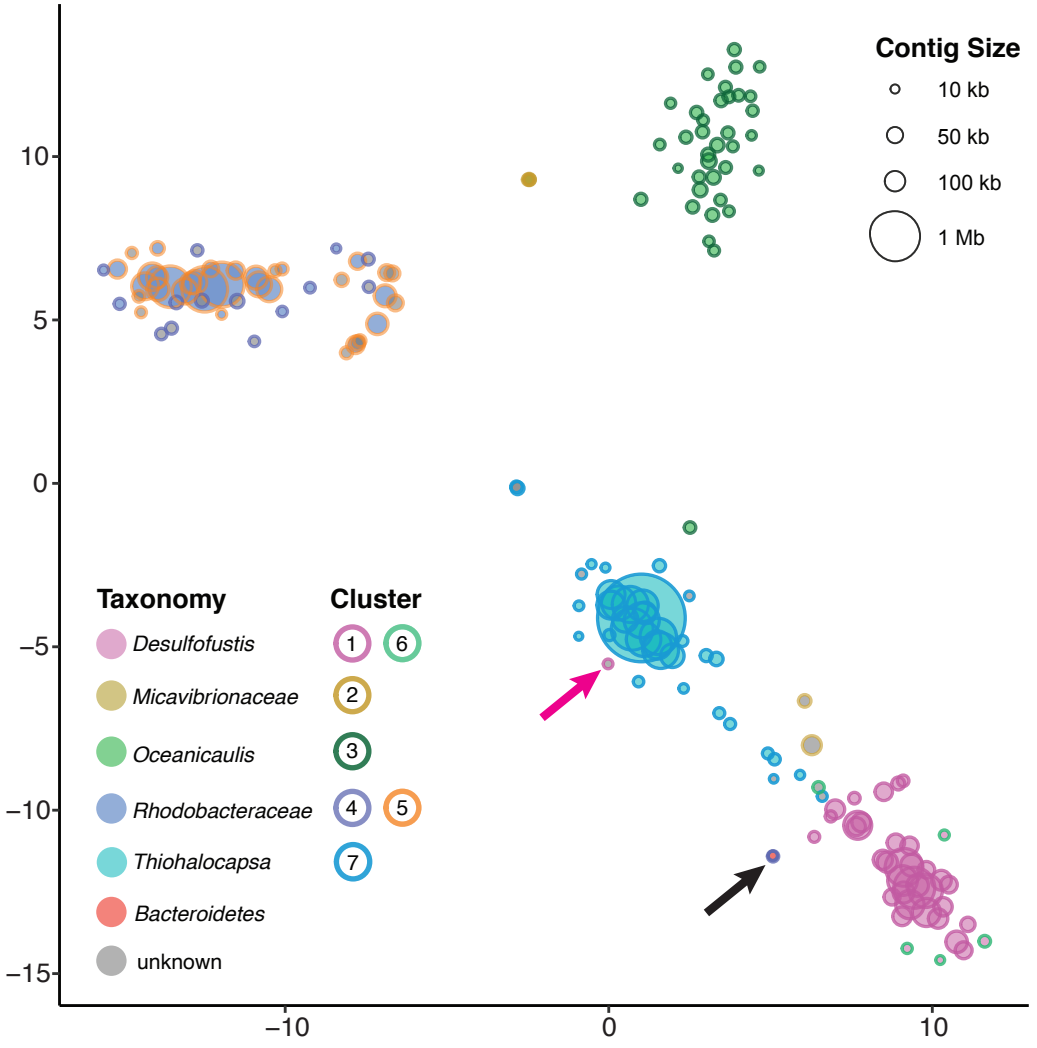

6630000 6632000 6634000 6636000 6638000 6640000 6642000 6644000 6646000 6648000

*Thiohalocapsa* PB-PSB1

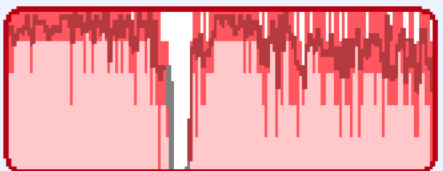

attR

prophage

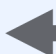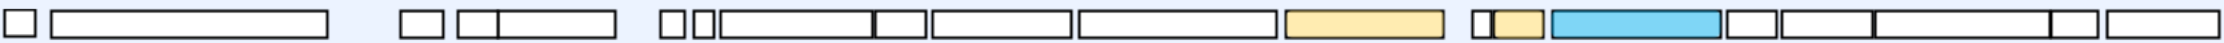

beta-lactamase 1  
fosfomycin thiol transferase  
beta-lactamase 2

0 2000 4000 6000 8000 10000 12000 14000 16000

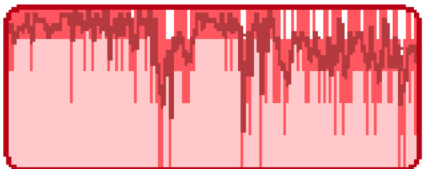

unitig\_26 (*Desulfofustis* PB-SRB1)

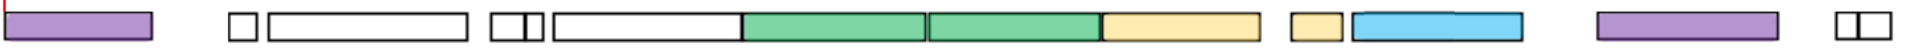

IS 481  
D-glutamate deacylase  
Prolidase  
beta-lactamase 1  
fosfomycin thiol transferase  
beta-lactamase 2  
IS 701



**A**

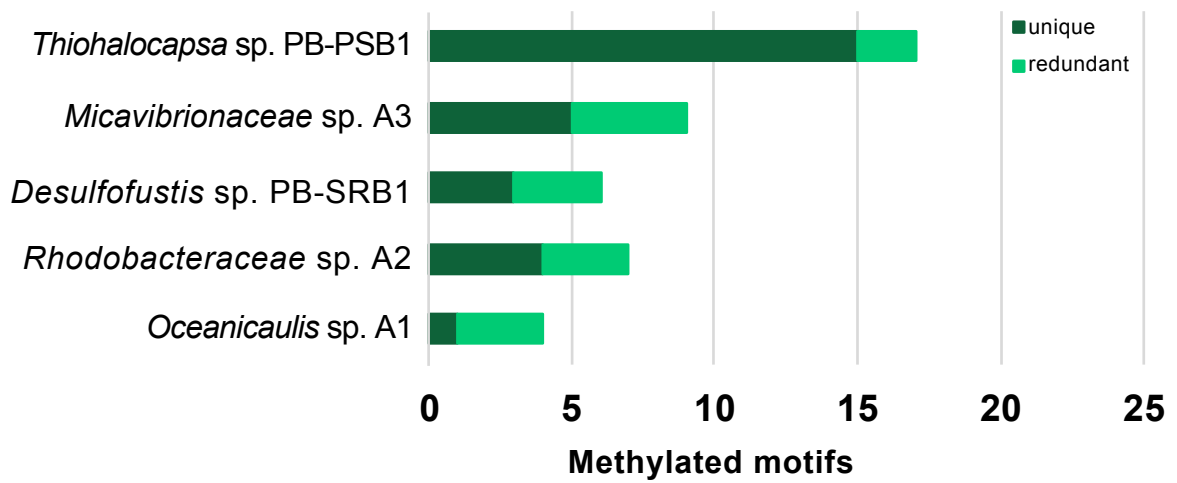

**B**

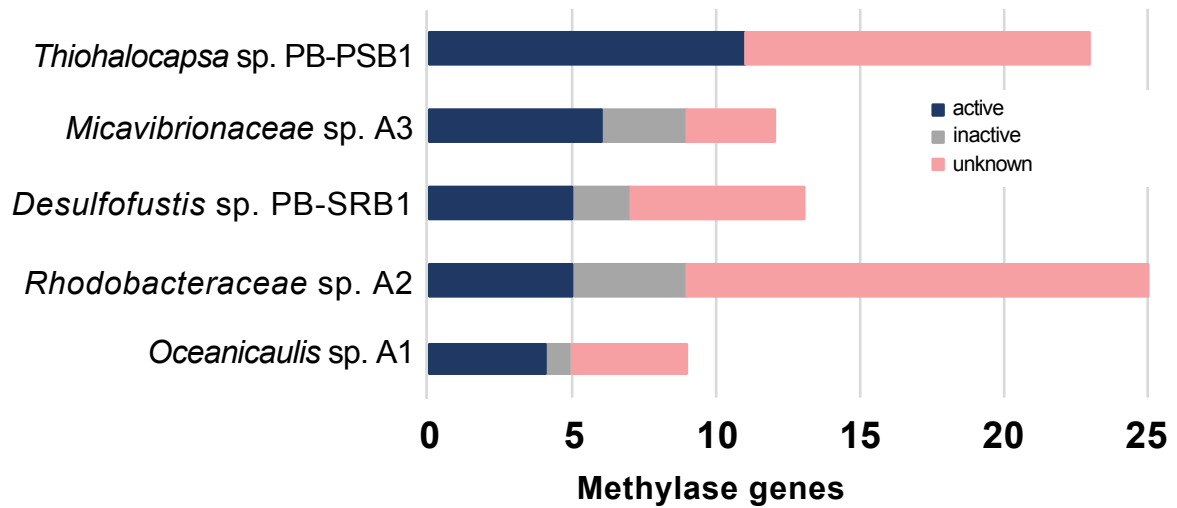

**C**

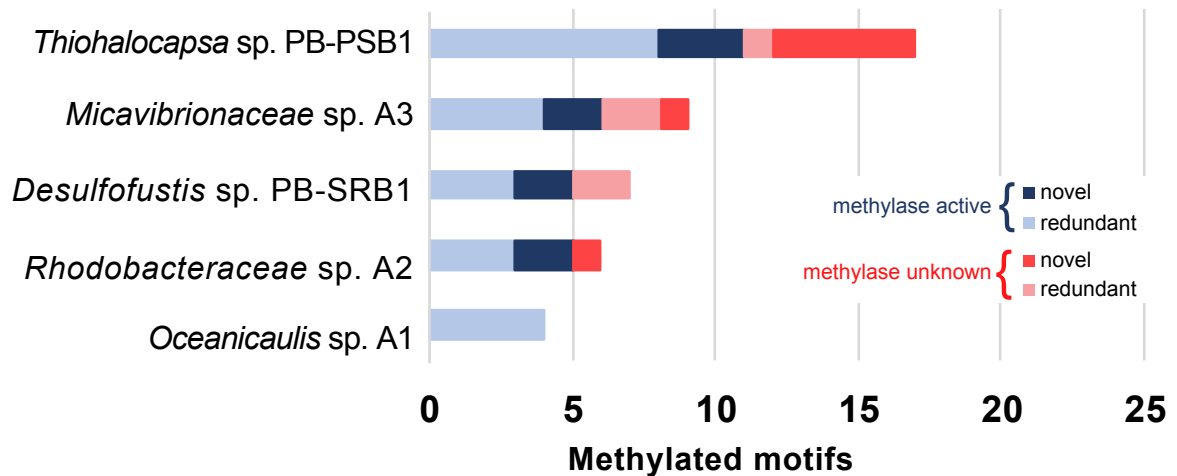

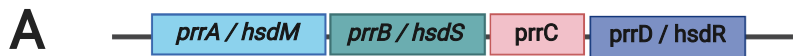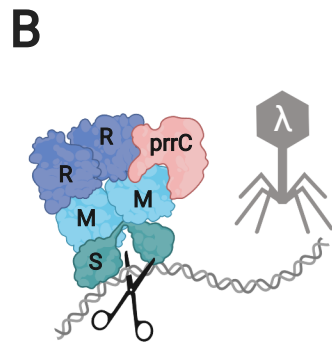

foreign DNA cleaved

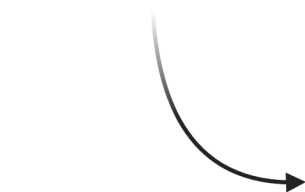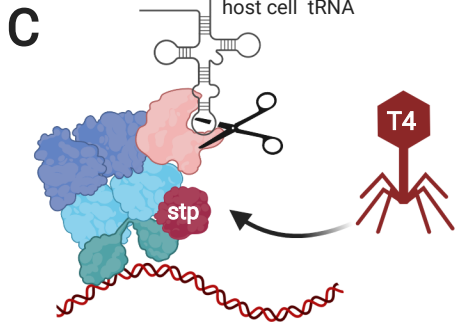

host tRNA depleted

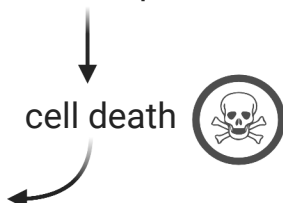

**Table 1.** Summary of the 7 methylation-based hierarchical clusters of metagenomic contigs defined in Figure 2. Metagenome-assembled genomes (MAGs) with completeness >90% are represented by methylation cluster 7, clusters 1+6, and clusters 4+5. Completeness was assessed by presence of lineage-specific single copy marker genes, while contamination was assessed by their presence in >1 copy. The proportion of observed multicopy marker gene sets sharing  $\geq 97\%$  amino acid identity (aai) is represented in the “strain heterogeneity” metric. For example, 16 marker genes in the *Rhodobacteraceae* MAG (clusters 4+5, bottom line in table) were found in duplicate copies. In 12 of these 16 genes though, their duplicate copies shared  $\geq 97\%$  aai, indicating these “contaminants” derived from highly similar strains or incomplete assemblies, rather inclusion of distant organisms due to binning errors (e.g. 75% strain het. = 12/16).

| Cluster # | Taxonomic assignment           | Contigs | Size (bp) | Max contig | N50     | Avg Cov | Max Cov | Min Cov | Completeness | Contam. | Strain het (97% aai) |
|-----------|--------------------------------|---------|-----------|------------|---------|---------|---------|---------|--------------|---------|----------------------|
| 1         | <i>Desulfofustis</i> PB-SRB1   | 34      | 4,050,579 | 605,607    | 231,618 | 51      | 74      | 28      |              |         |                      |
| 2         | <i>Micavibrionaceae</i>        | 6       | 158,640   | 75,497     | 15,262  | 50      | 110     | 24      |              |         |                      |
| 3         | <i>Oceanicaulis alexandrii</i> | 36      | 613,165   | 33,317     | 18,029  | 64      | 84      | 47      | 14%          | 0%      |                      |
| 4         | <i>Rhodobacteraceae</i>        | 17      | 255,557   | 25,798     | 15,190  | 14      | 40      | 7       |              |         |                      |
| 5         | <i>Rhodobacteraceae</i>        | 34      | 4,521,144 | 784,839    | 219,055 | 33      | 46      | 15      |              |         |                      |
| 6         | <i>Desulfofustis</i> PB-SRB1   | 5       | 63,498    | 16,429     | 15,320  | 11      | 16      | 8       |              |         |                      |
| 7         | <i>Thiohalocapsa</i> PB-PSB1   | 37      | 8,339,806 | 3,497,020  | 450,066 | 231     | 507     | 16      | 99%          | 6.6%    | 61%                  |
| 1 + 6     | <i>Desulfofustis</i> PB-SRB1   | 39      | 4,114,077 | 605,607    | 231,618 | 46      | 74      | 8       | 99%          | 0.3%    | 0                    |
| 4 + 5     | <i>Rhodobacteraceae</i>        | 51      | 4,776,701 | 784,839    | 219,055 | 27      | 46      | 7       | 95%          | 4.4%    | 75%                  |

**Table 2.** A total of 606 insertion-sequence (IS) elements were identified in the finished, circularized genome of *Thiohalocapsa* sp. PB-PSB1. IS elements were classified into phylogenetically distinct families (based on the ACLAME database), and the total instances of each class was enumerated. The total number of nucleotides within each IS element class was determined and its percentage of the complete genome computed.

| family       | #          | nucleotides    | % of genome |
|--------------|------------|----------------|-------------|
| IS4          | 190        | 174,828        | 2.2         |
| IS91         | 120        | 172,158        | 2.17        |
| ISL3         | 54         | 65,064         | 0.82        |
| IS5          | 50         | 52,601         | 0.66        |
| ISAS1        | 35         | 40,445         | 0.51        |
| IS630        | 29         | 36,442         | 0.46        |
| ISAZO13      | 18         | 26,086         | 0.33        |
| IS110        | 16         | 27,959         | 0.35        |
| IS66         | 16         | 32,674         | 0.41        |
| IS1634       | 15         | 28,613         | 0.36        |
| IS21         | 15         | 30,347         | 0.38        |
| IS200/IS605  | 14         | 8,291          | 0.1         |
| IS1182       | 10         | 16,013         | 0.2         |
| ISKRA4       | 9          | 15,814         | 0.2         |
| IS701        | 7          | 12,957         | 0.16        |
| IS3          | 4          | 4,224          | 0.05        |
| ISNCY        | 3          | 2,815          | 0.04        |
| new          | 1          | 1,846          | 0.02        |
| <b>total</b> | <b>606</b> | <b>749,177</b> | <b>9.42</b> |
